# Supplementary material for: Colonoscopy in Colorectal-Cancer Screening for Detection of Advanced Neoplasia
Source: Atypon-hosted journal article supplement (doi:10.1056/nejmoa054967), 2006-11-02
Supplement: nejm_regula_sa1.pdf [file nejm_regula_sa1.pdf]

## Supplementary Appendix

This appendix has been provided by the authors to give readers additional information about their work.

Supplement to: Regula J, Rupinski M, Kraszewska E, et al. Colonoscopy in colorectal-cancer screening for detection of advanced neoplasia. *N Engl J Med* 2006;355:1863-72.

Web Only Appendix. Ratios between numbers needed to screen to detect advanced

neoplasia, comparing men to women.\*

|                                     | Women (all)                           |                     |                     |                     |
|-------------------------------------|---------------------------------------|---------------------|---------------------|---------------------|
| Men (all)                           | age 40-49                             | age 50-54           | age 55-59           | age 60-66           |
| age 40-49                           | 0.62 [0.48, 0.79] †                   | 0.80 [0.65, 0.97] † | 1.02 [0.84, 1.24]   | 1.24 [1.02,1.51] †  |
| age 50-54                           | 0.45 [0.37, 0.55] †                   | 0.58 [0.50, 0.67] † | 0.74 [0.65, 0.85] † | 0.90 [0.79, 1.03]   |
| age 55-59                           | 0.31 [0.25, 0.37] †                   | 0.40 [0.35, 0.45] † | 0.51 [0.45, 0.58] † | 0.62 [0.54, 0.70] † |
| age 60-66                           | 0.26 [0.21, 0.31] †                   | 0.33 [0.29, 0.38] † | 0.43 [0.38, 0.48] † | 0.52 [0.46, 0.59] † |
|                                     | Women (positive CRC FH <sup>‡</sup> ) |                     |                     |                     |
| Men (positive CRC FH <sup>‡</sup> ) | age 40-49                             | age 50-54           | age 55-59           | age 60-66           |
| age 40-49                           | 0.63 [0.48, 0.84] †                   | 1.00 [0.74, 1.34]   | 1.14 [0.85, 1.54]   | 1.30 [0.95, 1.78]   |
| age 50-54                           | 0.39 [0.29, 0.53] †                   | 0.62 [0.45, 0.85] † | 0.71 [0.51, 0.98] † | 0.81 [0.58, 1.13]   |
| age 55-59                           | 0.23 [0.18, 0.31] †                   | 0.37 [0.27, 0.49] † | 0.42 [0.31, 0.57] † | 0.48 [0.35, 0.65] † |
| age 60-66                           | 0.19 [0.14, 0.25] †                   | 0.30 [0.22, 0.40] † | 0.34 [0.25, 0.46] † | 0.39 [0.29, 0.53] † |

|                                                             | Women (with negative CRC FH <sup>‡</sup> ) |                     |                     |                     |
|-------------------------------------------------------------|--------------------------------------------|---------------------|---------------------|---------------------|
| Men (negative CRC FH <sup>‡</sup> )                         | age 40-49                                  | age 50-54           | age 55-59           | age 60-66           |
| age 40-49                                                   | 0.57 [0.35, 0.95] †                        | 0.98 [0.68, 1.42]   | 1.30 [0.90, 1.88]   | 1.61 [1.12, 2.32] † |
| age 50-54                                                   | 0.33 [0.23, 0.48] †                        | 0.56 [0.48, 0.66] † | 0.75 [0.64, 0.87] † | 0.93 [0.80, 1.08]   |
| age 55-59                                                   | 0.23 [0.16, 0.33] †                        | 0.39 [0.34, 0.46] † | 0.52 [0.45, 0.60] † | 0.65 [0.56, 0.74] † |
| age 60-66                                                   | 0.19 [0.13, 0.28] †                        | 0.33 [0.29, 0.38] † | 0.44 [0.38, 0.50] † | 0.54 [0.48, 0.62] † |
|                                                             | Women (all)                                |                     |                     |                     |
| Men                                                         | age 40-49                                  | age 50-54           | age 55-59           | age 60-66           |
| age 40-49, two first degree relatives with CRC <sup>‡</sup> | 0.3 [0.13, 0.70] †                         | 0.39 [0.17, 0.90] † | 0.5 [0.21, 1.15]    | 0.6 [0.26, 1.39]    |
| age 40-49, one first degree                                 | 0.45 [0.31, 0.65] †                        | 0.58 [0.41, 0.81] † | 0.74 [0.52, 1.04]   | 0.90 [0.64, 1.26]   |

|                                                                                         |                     |                   |                   |                   |
|-----------------------------------------------------------------------------------------|---------------------|-------------------|-------------------|-------------------|
| relative with<br>CRC <sup>‡</sup> under 60<br>years                                     |                     |                   |                   |                   |
| age 40-49, one<br>first degree<br>relative with<br>CRC <sup>‡</sup> 60 years<br>or more | 0.64 [0.46, 0.88] † | 0.82 [0.62, 1.09] | 1.05 [0.79, 1.40] | 1.28 [0.96, 1.70] |

\* Values represent ratios between numbers needed to screen for men and women with a 95 percent confidence interval. Ratios less than 1.0 indicate that men were more likely than women to have advanced neoplasia and greater than 1.0 indicate women were more likely.

† Indicates a statistically significant ratio.

‡ CRC FH denotes colorectal cancer family history defined in this table as one or two first degree relative(s) with colorectal cancer. CRC denotes colorectal cancer.
